# Supplementary material for: Data-driven insights into the performance of scalable magnetic clay-based composites for pollutant removal
Source: Royal Society of Chemistry journal article supplement (doi:10.1039/d6ra01195k), 2026-05-19
Supplement: d6ra01195k1.pdf [file d6ra01195k1.pdf]

## Data-driven insights into the performance of scalable magnetic clay-based composites for pollutant removal

Maurizio Vespignani<sup>1,2</sup>, Simona Ortelli<sup>1\*</sup>, Magda Blosi<sup>1\*</sup>, Ilaria Zanoni<sup>1</sup>, Milad Takhsha<sup>3</sup>, Franca Albertini<sup>3</sup>, Irini Furxhi<sup>1</sup>, Marina Naldi<sup>4</sup>, Wendy Appiagyei Mensah<sup>4</sup>, Alice Piraccini<sup>4</sup>, Anna Luisa Costa<sup>1</sup>.

<sup>1</sup> CNR-ISSMC, National Research Council of Italy-Institute of Science, Technology and Sustainability for Ceramics, Via Granarolo 64, 48018 Faenza, Italy.

<sup>2</sup> Department of Chemical Science, Life and Environmental Sustainability, Parma University, Parco Area delle Scienze, 11A, 43124 Parma, Italy.

<sup>3</sup> CNR-IMEM, National Research Council of Italy-Institute of Materials for Electronics and Magnetism, Parco Area delle Scienze, 37/A, 43124 Parma, Italy.

<sup>4</sup> Department of Pharmacy and Biotechnology, Alma Mater Studiorum University of Bologna, Via Belmeloro, 6, 40126 Bologna, Italy.

\*Corresponding: simona.ortelli@issmc.cnr.it (S.Ortelli), magda.blosi@issmc.cnr.it (M. Blosi)

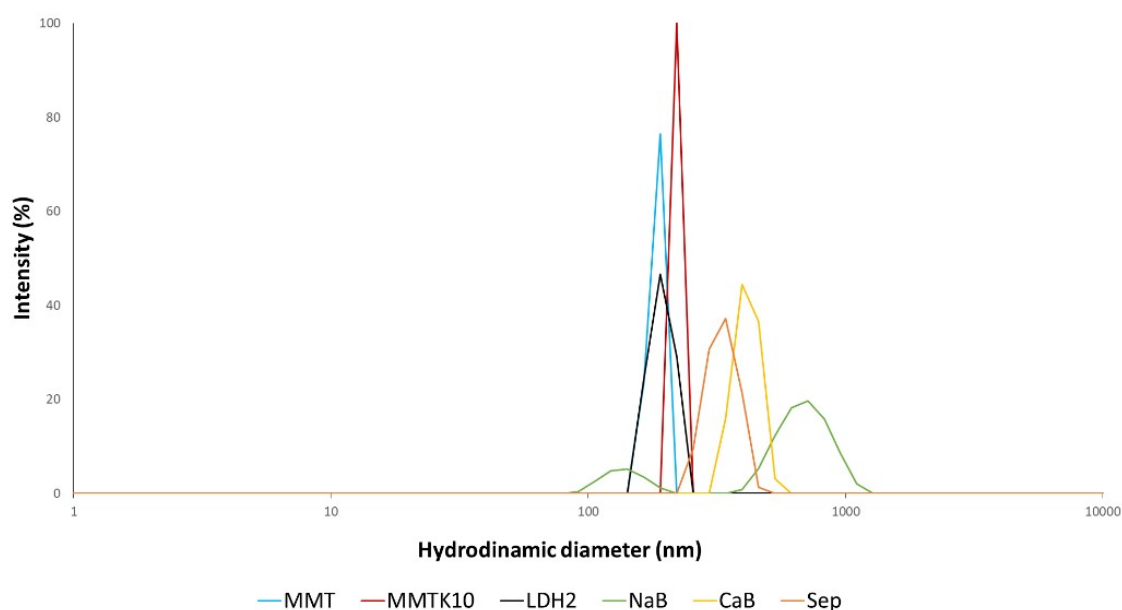

**Figure S1** Hydrodynamic size distribution of pure clays in aqueous media at a concentration of 0.1g L<sup>-1</sup> and a temperature of 25°C.

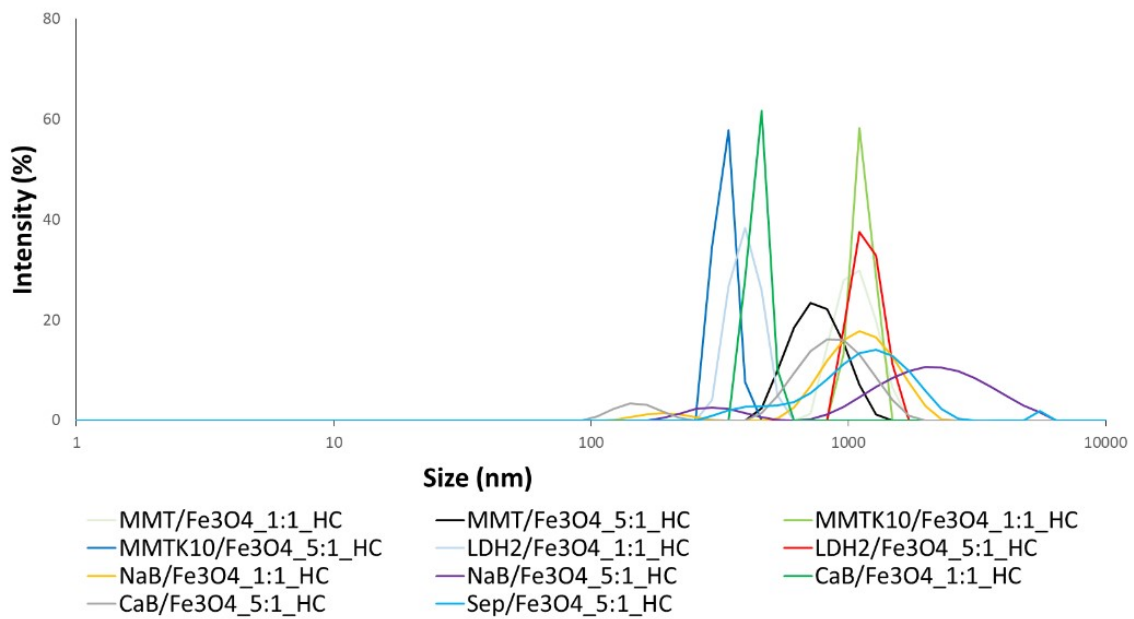

**Figure S2** Hydrodynamic size distribution of different heterocoagulated samples in aqueous media at a concentration of  $0.1\text{g L}^{-1}$  and a temperature of  $25^\circ\text{C}$ .

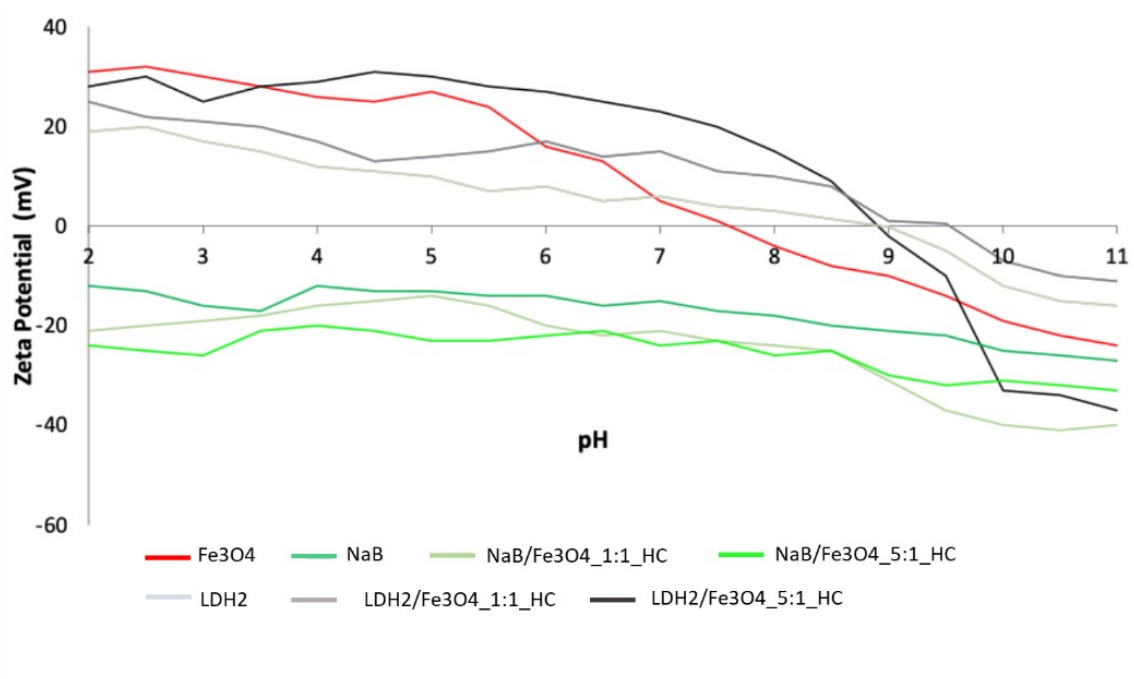

**Figure S3** Zeta potential variation along the pH range for negatively-charged (NaB) and positively-charged (LDH2) heterocoagulated samples in aqueous media at a concentration of  $0.1\text{g L}^{-1}$  and a temperature of  $25^\circ\text{C}$ .

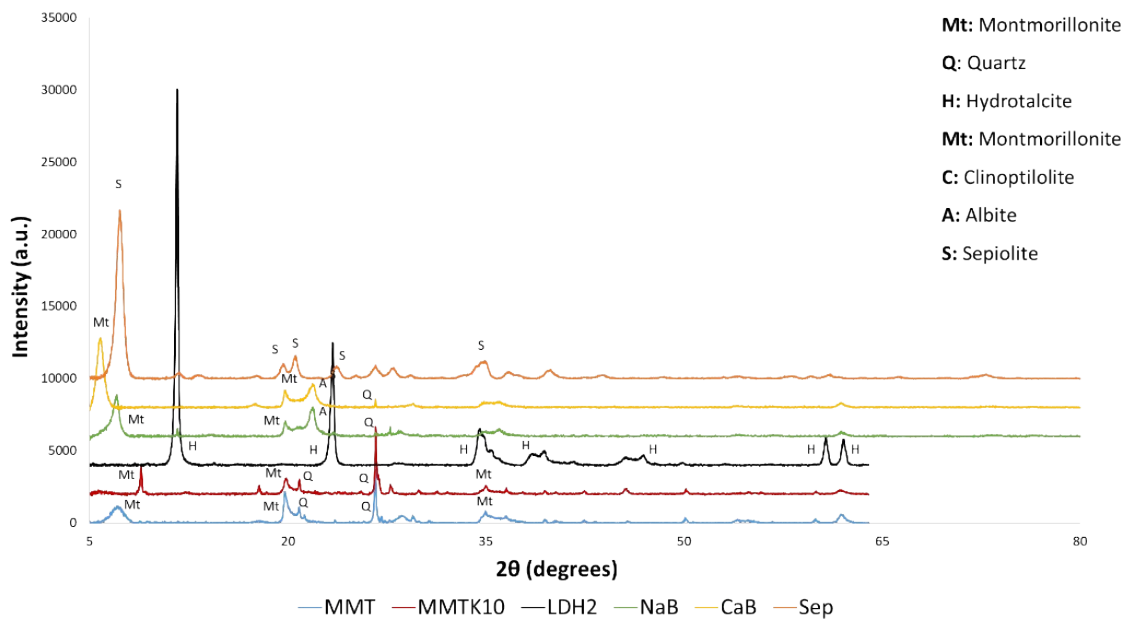

**Figure S4** XRD diffractograms of pure clays recorded in the range 5-80 °2θ, counting for 0.5 sec every 0.02 °2θ step.

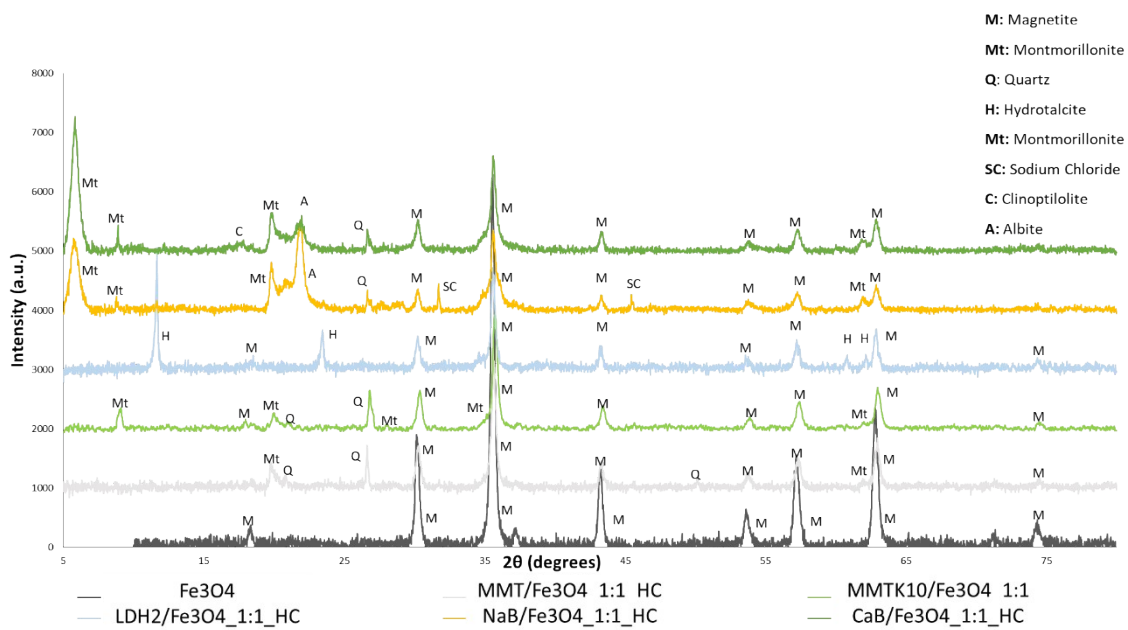

**Figure S5** XRD diffractograms of magnetite and HC 1:1 samples recorded in the range 5-80 °2θ, counting for 0.5 sec every 0.02 °2θ step.

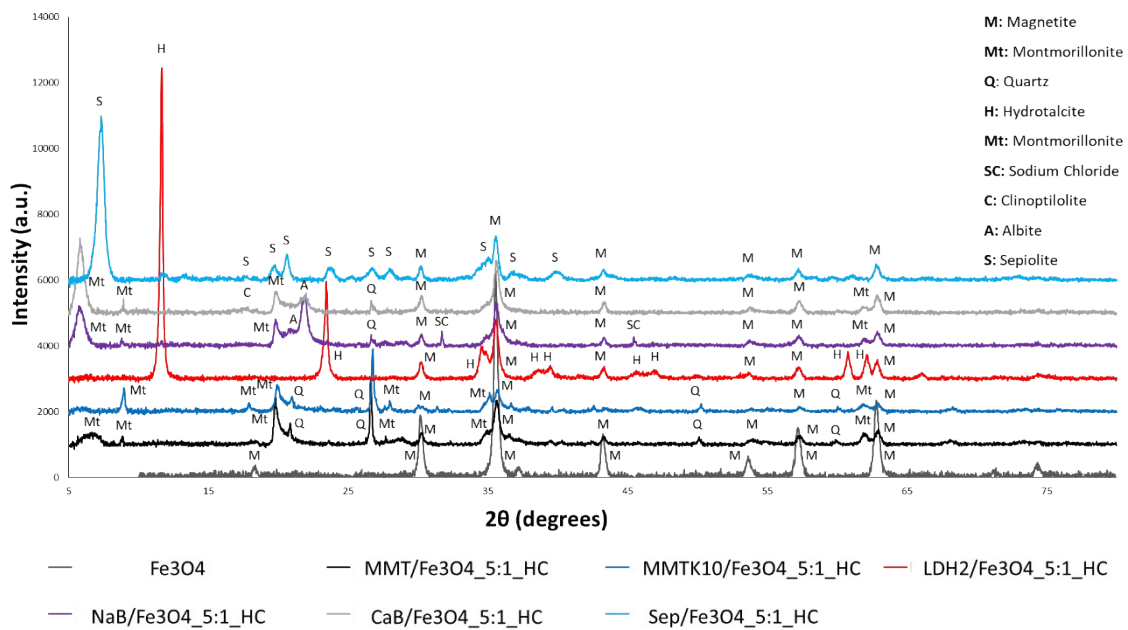

**Figure S6** XRD diffractograms of magnetite and HC 5:1 samples recorded in the range 5-80 °2θ, counting for 0.5 sec every 0.02 °2θ step.

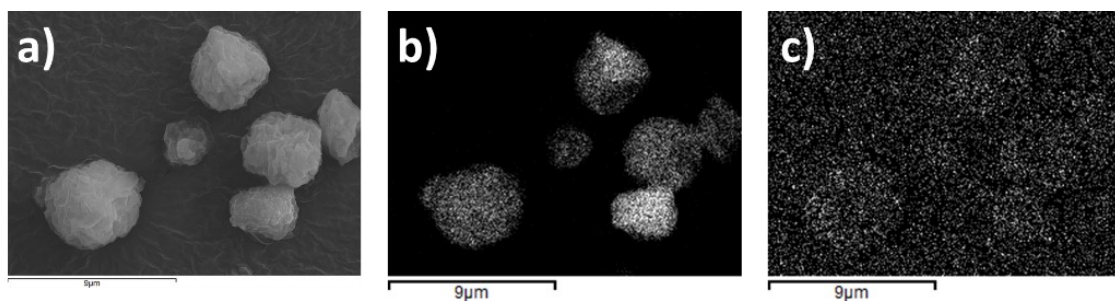

**Figure S7** a) SEM photo of CaB/Fe<sub>3</sub>O<sub>4</sub>\_1:1\_HC; b) iron distribution within CaB/Fe<sub>3</sub>O<sub>4</sub>\_1:1\_HC identified through EDS map; c) gold distribution within CaB/Fe<sub>3</sub>O<sub>4</sub>\_1:1\_HC identified through EDS map.

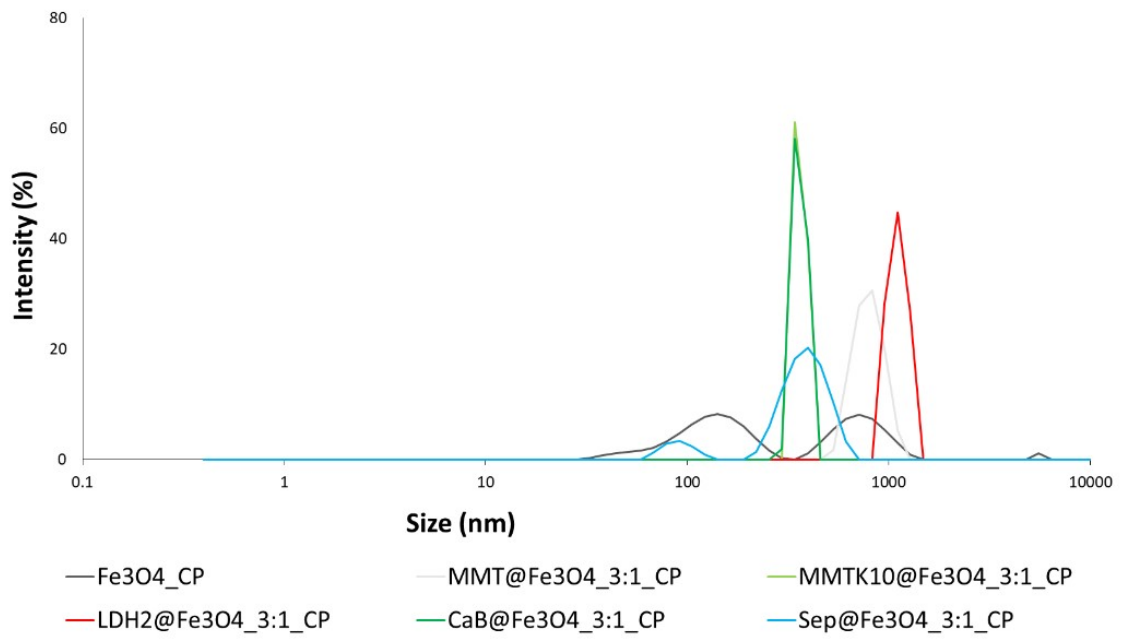

**Figure S8** Hydrodynamic diameter distribution of different coprecipitated samples in aqueous media at a concentration of  $0.1\text{g L}^{-1}$  and a temperature of  $25^\circ\text{C}$ .

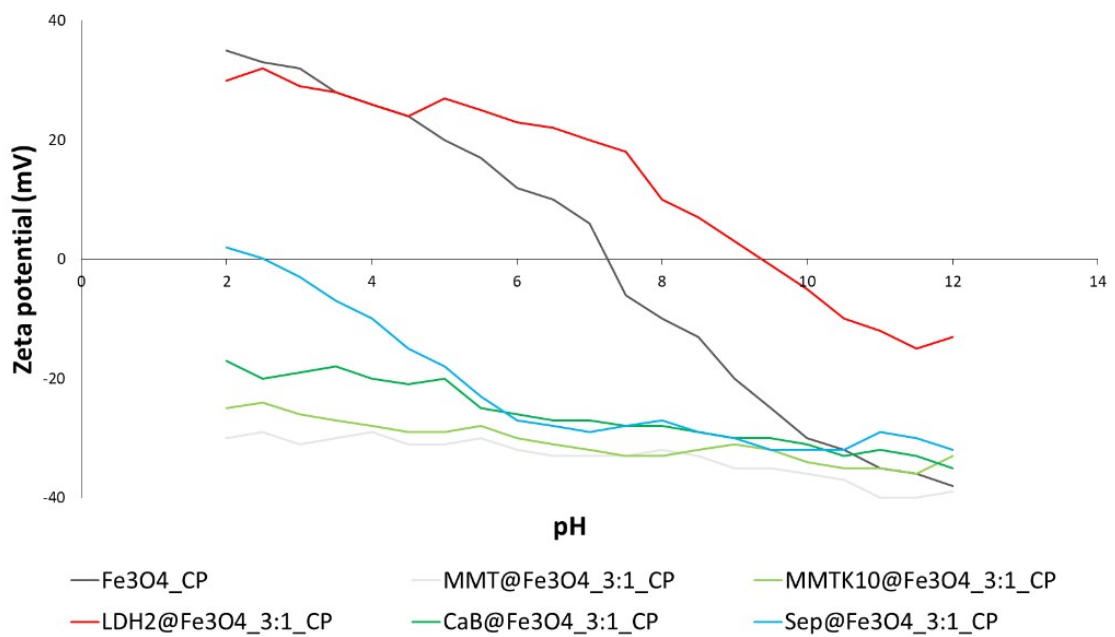

**Figure S9** Zeta potential variation along the pH range for coprecipitated samples in aqueous media at a concentration of  $0.1\text{g L}^{-1}$  and a temperature of  $25^\circ\text{C}$ .

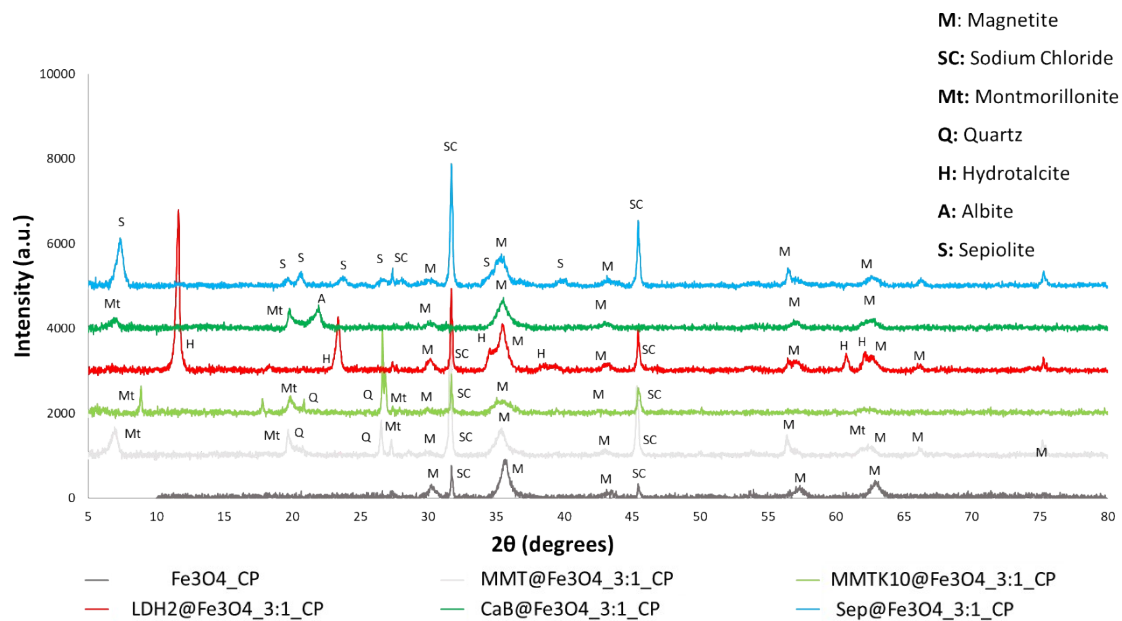

**Figure S10** XRD diffractograms of coprecipitated samples recorded in the range 5-80 °2θ, counting for 0.5 sec every 0.02 °2θ step.

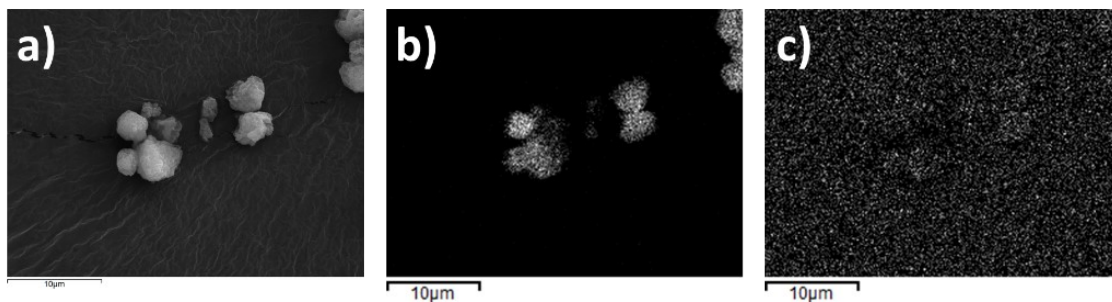

**Figure S11** a) SEM photo of CaB@Fe<sub>3</sub>O<sub>4</sub>\_3:1\_CP; b) iron distribution within CaB@Fe<sub>3</sub>O<sub>4</sub>\_3:1\_CP identified through EDS map; c) gold distribution within CaB@Fe<sub>3</sub>O<sub>4</sub>\_3:1\_CP identified through EDS map.

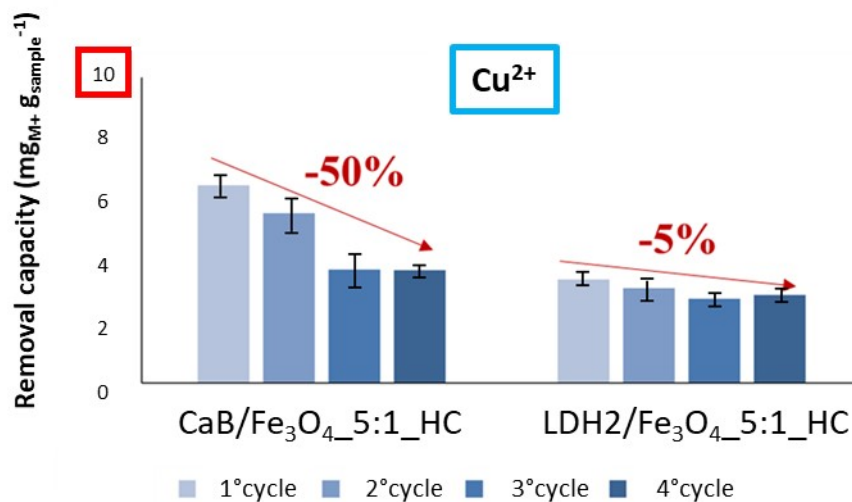

**Figure S12** Cu<sup>2+</sup> removal test along with 4 re-use cycles performed by using both CaB/Fe<sub>3</sub>O<sub>4</sub>\_5:1\_HC and LDH2/Fe<sub>3</sub>O<sub>4</sub>\_5:1\_HC samples.

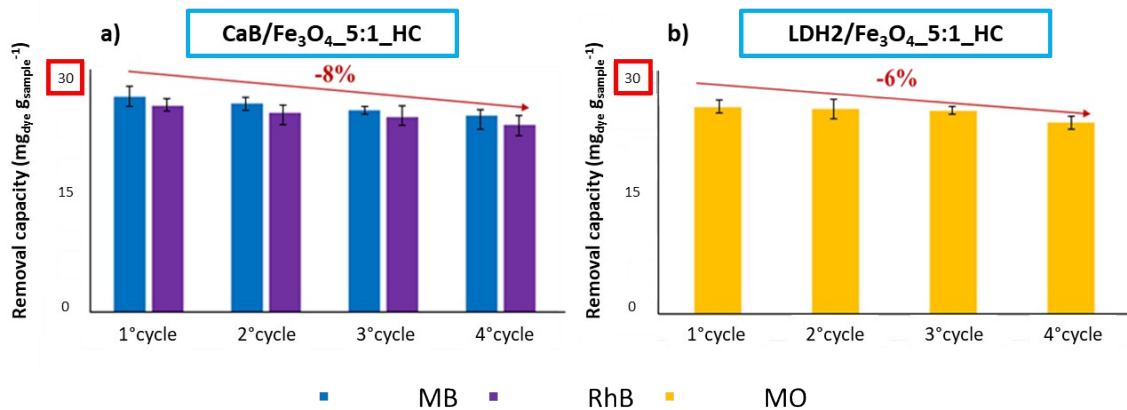

**Figure S13** Dye removal test along with 4 re-use cycles performed by using a) CaB/Fe<sub>3</sub>O<sub>4</sub>\_5:1\_HC and b) LDH2/Fe<sub>3</sub>O<sub>4</sub>\_5:1\_HC samples.

**Table S1** Fe<sub>3</sub>O<sub>4</sub>-clay composites synthesised via heterocoagulation (HC) and coprecipitation (CP).

| Sample name                                   | Heterocoagulation/Coprecipitation pH |
|-----------------------------------------------|--------------------------------------|
| MMT/Fe <sub>3</sub> O <sub>4</sub> _1:1_HC    | 5-6                                  |
| MMT/Fe <sub>3</sub> O <sub>4</sub> _5:1_HC    | 5-6                                  |
| MMTK10/Fe <sub>3</sub> O <sub>4</sub> _1:1_HC | 5-6                                  |
| MMTK10/Fe <sub>3</sub> O <sub>4</sub> _5:1_HC | 5-6                                  |
| LDH2/Fe <sub>3</sub> O <sub>4</sub> _1:1_HC   | 8-9                                  |
| LDH2/Fe <sub>3</sub> O <sub>4</sub> _5:1_HC   | 8-9                                  |
| NaB/Fe <sub>3</sub> O <sub>4</sub> _1:1_HC    | 5-6                                  |
| NaB/Fe <sub>3</sub> O <sub>4</sub> _5:1_HC    | 5-6                                  |
| CaB/Fe <sub>3</sub> O <sub>4</sub> _1:1_HC    | 5-6                                  |
| CaB/Fe <sub>3</sub> O <sub>4</sub> _5:1_HC    | 5-6                                  |
| Sep/Fe <sub>3</sub> O <sub>4</sub> _5:1_HC    | 5-6                                  |
| Fe <sub>3</sub> O <sub>4</sub> _CP            | 10                                   |
| MMT@Fe <sub>3</sub> O <sub>4</sub> _3:1_CP    | 10                                   |
| MMTK10@Fe <sub>3</sub> O <sub>4</sub> _3:1_CP | 10                                   |
| LDH2@Fe <sub>3</sub> O <sub>4</sub> _3:1_CP   | 10                                   |
| CaB@Fe <sub>3</sub> O <sub>4</sub> _3:1_CP    | 10                                   |
| Sep@Fe <sub>3</sub> O <sub>4</sub> _3:1_CP    | 10                                   |

**Table S2** Colloidal characterisation of heterocoagulated samples.

| Sample name                                   | pH <sub>nat</sub> | d <sub>DLS</sub> <sup>a</sup> | ζ <sup>b</sup> | pH <sub>I<sub>EP</sub></sub> |
|-----------------------------------------------|-------------------|-------------------------------|----------------|------------------------------|
| Fe <sub>3</sub> O <sub>4</sub>                | 4.4               | 55±5                          | 31±2           | 7.5                          |
| MMT                                           | 6.8               | 515±95                        | -34±2          | <2                           |
| MMTK10                                        | 4.8               | 320±40                        | -17±1          | <2                           |
| LDH2                                          | 7.6               | 1160±160                      | 16±2           | 8.9                          |
| NaB                                           | 6.7               | 125±25                        | -15±1          | <2                           |
| CaB                                           | 7.2               | 410±60                        | -10±2          | <2                           |
| Sep                                           | 8.3               | 320±55                        | -14±3          | 2.8                          |
| MMT/Fe <sub>3</sub> O <sub>4</sub> _1:1_HC    | 7.2               | 1130±135                      | -20±4          | <2                           |
| MMT/Fe <sub>3</sub> O <sub>4</sub> _5:1_HC    | 7.5               | 625±65                        | -18±5          | <2                           |
| MMTK10/Fe <sub>3</sub> O <sub>4</sub> _1:1_HC | 4.6               | 1120±160                      | -8±3           | <2                           |
| MMTK10/Fe <sub>3</sub> O <sub>4</sub> _5:1_HC | 4.9               | 330±45                        | -15±5          | <2                           |
| LDH2/Fe <sub>3</sub> O <sub>4</sub> _1:1_HC   | 8.3               | 1180±65                       | 2±1            | 8.4                          |

|                                             |     |          |       |     |
|---------------------------------------------|-----|----------|-------|-----|
| LDH2/Fe <sub>3</sub> O <sub>4</sub> _5:1_HC | 8.7 | 1350±195 | 8±3   | 9.3 |
| NaB/Fe <sub>3</sub> O <sub>4</sub> _1:1_HC  | 6.3 | 170±40   | -25±4 | <2  |
| NaB/Fe <sub>3</sub> O <sub>4</sub> _5:1_HC  | 6.7 | 280±75   | -21±5 | <2  |
| CaB/Fe <sub>3</sub> O <sub>4</sub> _1:1_HC  | 5.2 | 490±95   | -11±5 | <2  |
| CaB/Fe <sub>3</sub> O <sub>4</sub> _5:1_HC  | 6.4 | 740±230  | -14±6 | <2  |
| Sep/Fe <sub>3</sub> O <sub>4</sub> _5:1_HC  | 5.2 | 750±200  | -15±4 | <2  |

a= nm, b= mV.

**Table S3** Real Fe<sub>3</sub>O<sub>4</sub> percentage within HC composite samples. Theoretical percentage of Fe<sub>3</sub>O<sub>4</sub>: 50% for Clay/Fe<sub>3</sub>O<sub>4</sub>\_1:1 samples and 16% for Clay/Fe<sub>3</sub>O<sub>4</sub>\_5:1 samples.

| Sample name                                   | Fe <sub>3</sub> O <sub>4</sub> real amount (%) |
|-----------------------------------------------|------------------------------------------------|
| Fe <sub>3</sub> O <sub>4</sub>                | 95                                             |
| MMT/Fe <sub>3</sub> O <sub>4</sub> _1:1_HC    | 49                                             |
| MMT/Fe <sub>3</sub> O <sub>4</sub> _5:1_HC    | 16                                             |
| MMTK10/Fe <sub>3</sub> O <sub>4</sub> _1:1_HC | 39                                             |
| MMTK10/Fe <sub>3</sub> O <sub>4</sub> _5:1_HC | 5                                              |
| LDH2/Fe <sub>3</sub> O <sub>4</sub> _1:1_HC   | 53                                             |
| LDH2/Fe <sub>3</sub> O <sub>4</sub> _5:1_HC   | 16                                             |
| NaB/Fe <sub>3</sub> O <sub>4</sub> _1:1_HC    | 39                                             |
| NaB/Fe <sub>3</sub> O <sub>4</sub> _5:1_HC    | 12                                             |
| CaB/Fe <sub>3</sub> O <sub>4</sub> _1:1_HC    | 44                                             |
| CaB/Fe <sub>3</sub> O <sub>4</sub> _5:1_HC    | 21                                             |
| Sep/Fe <sub>3</sub> O <sub>4</sub> _5:1_HC    | 17                                             |

**Table S4** Specific surface area data by BET analysis for heterocoagulated samples.

| Sample name                                   | Specific Surface Area (m <sup>2</sup> g <sup>-1</sup> ) |
|-----------------------------------------------|---------------------------------------------------------|
| Fe <sub>3</sub> O <sub>4</sub>                | 7                                                       |
| MMT                                           | 27                                                      |
| MMTK10                                        | 250                                                     |
| LDH2                                          | 18                                                      |
| NaB                                           | 41                                                      |
| CaB                                           | 76                                                      |
| Sep                                           | 225                                                     |
| MMT/Fe <sub>3</sub> O <sub>4</sub> _1:1_HC    | 37                                                      |
| MMT/Fe <sub>3</sub> O <sub>4</sub> _5:1_HC    | 30                                                      |
| MMTK10/Fe <sub>3</sub> O <sub>4</sub> _1:1_HC | 185                                                     |
| MMTK10/Fe <sub>3</sub> O <sub>4</sub> _5:1_HC | 160                                                     |
| LDH2/Fe <sub>3</sub> O <sub>4</sub> _1:1_HC   | 45                                                      |
| LDH2/Fe <sub>3</sub> O <sub>4</sub> _5:1_HC   | 52                                                      |
| NaB/Fe <sub>3</sub> O <sub>4</sub> _1:1_HC    | 50                                                      |
| NaB/Fe <sub>3</sub> O <sub>4</sub> _5:1_HC    | 51                                                      |
| CaB/Fe <sub>3</sub> O <sub>4</sub> _1:1_HC    | 66                                                      |
| CaB/Fe <sub>3</sub> O <sub>4</sub> _5:1_HC    | 97                                                      |
| Sep/Fe <sub>3</sub> O <sub>4</sub> _5:1_HC    | 230                                                     |

**Table S5** Colloidal characterisation of coprecipitated samples.

| Sample name                                | pH <sub>nat</sub> | d <sub>DLS</sub> <sup>a</sup> | ζ <sup>b</sup> | pH <sub>IIEP</sub> |
|--------------------------------------------|-------------------|-------------------------------|----------------|--------------------|
| Fe <sub>3</sub> O <sub>4</sub> _CP         | 6.6               | 115±30                        | 10±3           | 7.1                |
| MMT@Fe <sub>3</sub> O <sub>4</sub> _3:1_CP | 7.5               | 530±8                         | -29±4          | <2                 |

|                                               |     |         |       |     |
|-----------------------------------------------|-----|---------|-------|-----|
| MMTK10@Fe <sub>3</sub> O <sub>4</sub> _3:1_CP | 7.7 | 450±35  | -33±7 | <2  |
| LDH2@Fe <sub>3</sub> O <sub>4</sub> _3:1_CP   | 7.5 | 1265±10 | 20±6  | 9.3 |
| CaB@Fe <sub>3</sub> O <sub>4</sub> _3:1_CP    | 7.7 | 510±30  | -28±4 | <2  |
| Sep@Fe <sub>3</sub> O <sub>4</sub> _3:1_CP    | 8.0 | 450±120 | -27±5 | 2.6 |

a= nm, b= mV.

**Table S6** Specific surface area data by BET analysis for coprecipitated samples.

| Sample                                        | Specific Surface Area (m <sup>2</sup> g <sup>-1</sup> ) |
|-----------------------------------------------|---------------------------------------------------------|
| Fe <sub>3</sub> O <sub>4</sub> _CP            | 78                                                      |
| MMT@Fe <sub>3</sub> O <sub>4</sub> _3:1_CP    | 45                                                      |
| MMTK10@Fe <sub>3</sub> O <sub>4</sub> _3:1_CP | 156                                                     |
| LDH2@Fe <sub>3</sub> O <sub>4</sub> _3:1_CP   | 66                                                      |
| CaB@Fe <sub>3</sub> O <sub>4</sub> _3:1_CP    | 117                                                     |
| Sep@Fe <sub>3</sub> O <sub>4</sub> _3:1_CP    | 172                                                     |

a= m<sup>2</sup> g<sup>-1</sup>.

**Table S7** Results of absorption test performed on heterocoagulated samples (mg<sub>M+</sub> g<sub>sample</sub><sup>-1</sup>). Relative standard deviations are between 0.01 and 0.06 mg<sub>M+</sub> g<sub>sample</sub><sup>-1</sup>.

| Sample name                                   | Cu <sup>2+</sup> adsorption 1h | Cu <sup>2+</sup> adsorption 24h | Fe <sup>3+</sup> adsorption 1h | Fe <sup>3+</sup> adsorption 24h |
|-----------------------------------------------|--------------------------------|---------------------------------|--------------------------------|---------------------------------|
| Fe <sub>3</sub> O <sub>4</sub>                | 1.9                            | 2.1                             | 12.2                           | 12.5                            |
| MMT                                           | 8.9                            | 9.3                             | 15.2                           | 15.3                            |
| MMTK10                                        | 1.8                            | 2.0                             | 12.4                           | 12.8                            |
| LDH2                                          | 2.0                            | 2.1                             | 15.5                           | 15.8                            |
| NaB                                           | 4.8                            | 5.1                             | 14.9                           | 15.6                            |
| CaB                                           | 8.7                            | 9.0                             | 15.1                           | 15.9                            |
| Sep                                           | 8.4                            | 8.6                             | 11.5                           | 12.3                            |
| MMT/Fe <sub>3</sub> O <sub>4</sub> _1:1_HC    | 7.7                            | 7.9                             | 14.5                           | 15.3                            |
| MMT/Fe <sub>3</sub> O <sub>4</sub> _5:1_HC    | 8.3                            | 8.6                             | 14.9                           | 15.5                            |
| MMTK10/Fe <sub>3</sub> O <sub>4</sub> _1:1_HC | 2.4                            | 2.7                             | 13.5                           | 14.2                            |
| MMTK10/Fe <sub>3</sub> O <sub>4</sub> _5:1_HC | 2.6                            | 3.0                             | 13.4                           | 14.5                            |
| LDH2/Fe <sub>3</sub> O <sub>4</sub> _1:1_HC   | 0.1                            | 2.2                             | 15.4                           | 15.6                            |
| LDH2/Fe <sub>3</sub> O <sub>4</sub> _5:1_HC   | 2.0                            | 2.3                             | 15.5                           | 15.9                            |
| NaB/Fe <sub>3</sub> O <sub>4</sub> _1:1_HC    | 3.6                            | 3.8                             | 14.4                           | 14.9                            |
| NaB/Fe <sub>3</sub> O <sub>4</sub> _5:1_HC    | 4.5                            | 4.8                             | 14.4                           | 15.1                            |
| CaB/Fe <sub>3</sub> O <sub>4</sub> _1:1_HC    | 6.2                            | 6.5                             | 14.8                           | 15.1                            |
| CaB/Fe <sub>3</sub> O <sub>4</sub> _5:1_HC    | 6.1                            | 6.7                             | 15.1                           | 15.5                            |
| Sep/Fe <sub>3</sub> O <sub>4</sub> _5:1_HC    | 7.5                            | 7.9                             | 11.9                           | 12.6                            |

**Table S8** Results of adsorption test performed on coprecipitated samples (mg<sub>M+</sub> g<sub>sample</sub><sup>-1</sup>). Relative standard deviations are between 0.01 and 0.06 mg<sub>M+</sub> g<sub>sample</sub><sup>-1</sup>.

| Sample name                                   | Cu <sup>2+</sup> adsorption 1h | Cu <sup>2+</sup> adsorption 24h | Fe <sup>3+</sup> adsorption 1h | Fe <sup>3+</sup> adsorption 24h |
|-----------------------------------------------|--------------------------------|---------------------------------|--------------------------------|---------------------------------|
| Fe <sub>3</sub> O <sub>4</sub> _CP            | 0.05                           | 0.1                             | 13.4                           | 13.7                            |
| MMT@Fe <sub>3</sub> O <sub>4</sub> _3:1_CP    | 2.1                            | 2.4                             | 12.9                           | 13.4                            |
| MMTK10@Fe <sub>3</sub> O <sub>4</sub> _3:1_CP | 0.7                            | 0.9                             | 14.1                           | 14.5                            |
| LDH2@Fe <sub>3</sub> O <sub>4</sub> _3:1_CP   | 0.9                            | 1.0                             | 14.6                           | 15.1                            |

|                                            |     |     |      |      |
|--------------------------------------------|-----|-----|------|------|
| CaB@Fe <sub>3</sub> O <sub>4</sub> _3:1_CP | 2.9 | 3.1 | 14.1 | 14.8 |
| Sep@Fe <sub>3</sub> O <sub>4</sub> _3:1_CP | 3.0 | 3.3 | 14.4 | 14.9 |

**Table S9** Results of dye adsorption by heterocoagulated samples (mg<sub>dye</sub> g<sup>-1</sup>). Relative standard deviations are in the range of 1-3%, attributable to the uncertainty associated with the measurement instrument used.

| Sample name                                   | RhB adsorption 1h | MO adsorption 1h | MB adsorption 1h |
|-----------------------------------------------|-------------------|------------------|------------------|
| Fe <sub>3</sub> O <sub>4</sub>                | 3.5               | 1.0              | 0.5              |
| MMT                                           | 18.7              | 2.8              | 6.4              |
| MMTK10                                        | 17.8              | 0.6              | 7.0              |
| LDH2                                          | 3.4               | 6.3              | 0.3              |
| NaB                                           | 16.5              | 0.9              | 6.8              |
| CaB                                           | 12.5              | 1.2              | 6.9              |
| Sep                                           | 18.5              | 1.0              | 7.0              |
| MMT/Fe <sub>3</sub> O <sub>4</sub> _1:1_HC    | 18.9              | 0.7              | 6.9              |
| MMT/Fe <sub>3</sub> O <sub>4</sub> _5:1_HC    | 18.9              | 0.5              | 6.7              |
| MMTK10/Fe <sub>3</sub> O <sub>4</sub> _1:1_HC | 18.9              | 1.2              | 7.0              |
| MMTK10/Fe <sub>3</sub> O <sub>4</sub> _5:1_HC | 19.7              | 1.2              | 7.0              |
| LDH2/Fe <sub>3</sub> O <sub>4</sub> _1:1_HC   | 5.1               | 6.6              | 0.9              |
| LDH2/Fe <sub>3</sub> O <sub>4</sub> _5:1_HC   | 7.2               | 6.6              | 0.4              |
| NaB/Fe <sub>3</sub> O <sub>4</sub> _1:1_HC    | 13.2              | 1.2              | 6.7              |
| NaB/Fe <sub>3</sub> O <sub>4</sub> _5:1_HC    | 15.2              | 0.9              | 6.7              |
| CaB/Fe <sub>3</sub> O <sub>4</sub> _1:1_HC    | 14.0              | 1.3              | 7.0              |
| CaB/Fe <sub>3</sub> O <sub>4</sub> _5:1_HC    | 18.7              | 1.0              | 7.0              |
| Sep/Fe <sub>3</sub> O <sub>4</sub> _5:1_HC    | 18.9              | 1.4              | 7.0              |

**Table S10** Results of dye adsorption by coprecipitated samples (mg<sub>dye</sub> g<sup>-1</sup>). Relative standard deviations are in the range of 1-3%, attributable to the uncertainty associated with the measurement instrument used.

| Sample name                                   | RhB adsorption 1h | MO adsorption 1h | MB adsorption 1h |
|-----------------------------------------------|-------------------|------------------|------------------|
| Fe <sub>3</sub> O <sub>4</sub> _CP            | 2.4               | 0.9              | 1.6              |
| MMT@Fe <sub>3</sub> O <sub>4</sub> _3:1_CP    | 10.5              | 0.6              | 6.8              |
| MMTK10@Fe <sub>3</sub> O <sub>4</sub> _3:1_CP | 11.3              | 0.8              | 7.0              |
| LDH2@Fe <sub>3</sub> O <sub>4</sub> _3:1_CP   | 9.6               | 5.3              | 3.0              |
| CaB@Fe <sub>3</sub> O <sub>4</sub> _3:1_CP    | 7.4               | 1.1              | 6.7              |
| Sep@Fe <sub>3</sub> O <sub>4</sub> _3:1_CP    | 12.3              | 0.3              | 7.0              |

**Table S11** Kinetic parameters for both heterocoagulated and coprecipitated samples against RhB after 1h of adsorption test.

| Sample name                    | Pseudo-First Order Reaction      |                             |                                   |                             | Pseudo-Second Order Reaction |                                   |                             |
|--------------------------------|----------------------------------|-----------------------------|-----------------------------------|-----------------------------|------------------------------|-----------------------------------|-----------------------------|
|                                | q <sub>e</sub> exp. <sup>a</sup> | K <sub>1</sub> <sup>b</sup> | q <sub>e</sub> calc. <sup>a</sup> | R <sub>1</sub> <sup>2</sup> | K <sub>2</sub> <sup>c</sup>  | q <sub>e</sub> calc. <sup>a</sup> | R <sub>2</sub> <sup>2</sup> |
| Fe <sub>3</sub> O <sub>4</sub> | 1.2                              | 1.2*10 <sup>-3</sup>        | 10.1                              | 0.91                        | 2.2*10 <sup>-2</sup>         | 1.3                               | 0.99                        |
| MMT                            | 6.5                              | 9.8*10 <sup>-4</sup>        | 3.7                               | 0.97                        | 4.2*10 <sup>-2</sup>         | 6.6                               | 0.99                        |
| MMTK10                         | 6.2                              | 1.1*10 <sup>-3</sup>        | 3.2                               | 0.95                        | 4.7*10 <sup>-2</sup>         | 6.3                               | 0.99                        |
| LDH2                           | 1.2                              | 7.5*10 <sup>-4</sup>        | 0.4                               | 0.86                        | 9.6*10 <sup>-2</sup>         | 1.2                               | 0.99                        |
| NaB                            | 5.8                              | 9.8*10 <sup>-4</sup>        | 0.2                               | 0.95                        | 1.5*10 <sup>-1</sup>         | 5.5                               | 1                           |
| CaB                            | 4.4                              | 1.1*10 <sup>-3</sup>        | 19.1                              | 0.91                        | 1.9*10 <sup>-2</sup>         | 4.1                               | 0.99                        |

|                                               |     |                      |       |      |                      |     |      |
|-----------------------------------------------|-----|----------------------|-------|------|----------------------|-----|------|
| Sep                                           | 6.5 | $1.4 \times 10^{-3}$ | 3.9   | 0.97 | $1.6 \times 10^{-1}$ | 6.5 | 1    |
| MMT/Fe <sub>3</sub> O <sub>4</sub> _1:1_HC    | 6.4 | $2.2 \times 10^{-3}$ | 33.8  | 0.87 | $3.1 \times 10^{-2}$ | 6.7 | 0.99 |
| MMT/Fe <sub>3</sub> O <sub>4</sub> _5:1_HC    | 6.6 | $1.5 \times 10^{-3}$ | 4.1   | 0.86 | $5.4 \times 10^{-2}$ | 6.8 | 0.99 |
| MMTK10/Fe <sub>3</sub> O <sub>4</sub> _1:1_HC | 5.6 | $5.8 \times 10^{-4}$ | 0.2   | 0.98 | $1.2 \times 10^{-1}$ | 6.7 | 1    |
| MMTK10/Fe <sub>3</sub> O <sub>4</sub> _5:1_HC | 5.5 | $1.5 \times 10^{-4}$ | 0.1   | 0.89 | $1.2 \times 10^{-1}$ | 6.9 | 1    |
| LDH2/Fe <sub>3</sub> O <sub>4</sub> _1:1_HC   | 1.8 | $1.1 \times 10^{-3}$ | 14.2  | 0.95 | $2.1 \times 10^{-2}$ | 1.9 | 0.99 |
| LDH2/Fe <sub>3</sub> O <sub>4</sub> _5:1_HC   | 2.5 | $1.8 \times 10^{-3}$ | 116.4 | 0.97 | $9.7 \times 10^{-3}$ | 2.8 | 0.98 |
| NaB/Fe <sub>3</sub> O <sub>4</sub> _1:1_HC    | 4.6 | $4.3 \times 10^{-4}$ | 1.6   | 0.88 | $4.3 \times 10^{-2}$ | 4.6 | 0.99 |
| NaB/Fe <sub>3</sub> O <sub>4</sub> _5:1_HC    | 5.3 | $8.5 \times 10^{-4}$ | 2.0   | 0.94 | $5.2 \times 10^{-2}$ | 5.3 | 0.99 |
| CaB/Fe <sub>3</sub> O <sub>4</sub> _1:1_HC    | 4.9 | $1.1 \times 10^{-3}$ | 39.8  | 0.97 | $1.5 \times 10^{-2}$ | 5.0 | 0.99 |
| CaB/Fe <sub>3</sub> O <sub>4</sub> _5:1_HC    | 6.6 | $1.1 \times 10^{-3}$ | 5.3   | 0.94 | $4.1 \times 10^{-2}$ | 6.7 | 0.99 |
| Sep/Fe <sub>3</sub> O <sub>4</sub> _5:1_HC    | 6.6 | $7.2 \times 10^{-4}$ | 0.5   | 0.97 | $8.4 \times 10^{-2}$ | 6.6 | 1    |
| Fe <sub>3</sub> O <sub>4</sub> _CP            | 0.8 | $7.5 \times 10^{-5}$ | 1.7   | 0.99 | $4.1 \times 10^{-2}$ | 0.9 | 0.99 |
| MMT@Fe <sub>3</sub> O <sub>4</sub> _3:1_CP    | 3.7 | $1.2 \times 10^{-3}$ | 39.8  | 0.97 | $1.4 \times 10^{-2}$ | 3.9 | 0.99 |
| MMTK10@Fe <sub>3</sub> O <sub>4</sub> _3:1_CP | 3.9 | $3.2 \times 10^{-4}$ | 39.8  | 0.87 | $6.8 \times 10^{-3}$ | 4.0 | 0.98 |
| LDH2@Fe <sub>3</sub> O <sub>4</sub> _3:1_CP   | 3.4 | $8.1 \times 10^{-4}$ | 199.5 | 0.92 | $3.5 \times 10^{-3}$ | 3.7 | 0.93 |
| CaB@Fe <sub>3</sub> O <sub>4</sub> _3:1_CP    | 2.6 | $7.4 \times 10^{-4}$ | 0.3   | 0.98 | $1.1 \times 10^{-1}$ | 2.6 | 0.99 |
| Sep@Fe <sub>3</sub> O <sub>4</sub> _3:1_CP    | 4.3 | $1.3 \times 10^{-3}$ | 2.5   | 0.88 | $5.9 \times 10^{-2}$ | 4.3 | 0.99 |

a= mg g<sup>-1</sup>, b= min<sup>-1</sup>, c= g<sup>-1</sup> mg<sup>-1</sup> min<sup>-0.5</sup>.

**Table S12** Kinetic parameters for both heterocoagulated and coprecipitated samples against MO after 1h of adsorption test.

| Sample name                                   | Pseudo-First Order Reaction      |                             |                                   |                             | Pseudo-Second Order Reaction |                                   |                             |
|-----------------------------------------------|----------------------------------|-----------------------------|-----------------------------------|-----------------------------|------------------------------|-----------------------------------|-----------------------------|
|                                               | q <sub>e</sub> exp. <sup>a</sup> | K <sub>1</sub> <sup>b</sup> | q <sub>e</sub> calc. <sup>a</sup> | R <sub>1</sub> <sup>2</sup> | K <sub>2</sub> <sup>c</sup>  | q <sub>e</sub> calc. <sup>a</sup> | R <sub>2</sub> <sup>2</sup> |
| Fe <sub>3</sub> O <sub>4</sub>                | 3.0                              | $3.9 \times 10^{-4}$        | 1.2                               | 0.96                        | $1.3 \times 10^{-3}$         | 1.1                               | 0.98                        |
| MMT                                           | 8.9                              | $5.6 \times 10^{-4}$        | 0.2                               | 0.97                        | $2.2 \times 10^{-3}$         | 9.1                               | 0.99                        |
| MMTK10                                        | 1.8                              | $5.2 \times 10^{-4}$        | 2.0                               | 0.96                        | $3.3 \times 10^{-2}$         | 1.8                               | 0.99                        |
| LDH2                                          | 19.8                             | $5.5 \times 10^{-4}$        | 10.5                              | 0.96                        | $1.7 \times 10^{-2}$         | 20.1                              | 0.99                        |
| NaB                                           | 2.9                              | $5.4 \times 10^{-4}$        | 0.7                               | 0.96                        | $2.4 \times 10^{-2}$         | 2.9                               | 0.99                        |
| CaB                                           | 3.7                              | $5.3 \times 10^{-4}$        | 0.4                               | 0.95                        | $1.1 \times 10^{-2}$         | 2.9                               | 0.99                        |
| Sep                                           | 3.2                              | $4.8 \times 10^{-4}$        | 0.3                               | 0.93                        | $3.6 \times 10^{-3}$         | 2.6                               | 0.94                        |
| MMT/Fe <sub>3</sub> O <sub>4</sub> _1:1_HC    | 2.3                              | $6.3 \times 10^{-4}$        | 1.2                               | 0.99                        | $7.7 \times 10^{-3}$         | 2.4                               | 0.99                        |
| MMT/Fe <sub>3</sub> O <sub>4</sub> _5:1_HC    | 1.6                              | $5.7 \times 10^{-4}$        | 2.8                               | 0.96                        | $2.2 \times 10^{-2}$         | 1.6                               | 0.99                        |
| MMTK10/Fe <sub>3</sub> O <sub>4</sub> _1:1_HC | 4.1                              | $5.8 \times 10^{-4}$        | 0.4                               | 0.97                        | $1.6 \times 10^{-2}$         | 4.2                               | 0.99                        |
| MMTK10/Fe <sub>3</sub> O <sub>4</sub> _5:1_HC | 3.7                              | $5.3 \times 10^{-4}$        | 0.4                               | 0.98                        | $1.8 \times 10^{-2}$         | 3.9                               | 1                           |
| LDH2/Fe <sub>3</sub> O <sub>4</sub> _1:1_HC   | 20.7                             | $5.3 \times 10^{-4}$        | 1.2                               | 0.97                        | $2.3 \times 10^{-2}$         | 20.8                              | 1                           |
| LDH2/Fe <sub>3</sub> O <sub>4</sub> _5:1_HC   | 20.7                             | $5.4 \times 10^{-4}$        | 1.2                               | 0.97                        | $4.6 \times 10^{-2}$         | 20.8                              | 0.99                        |
| NaB/Fe <sub>3</sub> O <sub>4</sub> _1:1_HC    | 3.8                              | $6.3 \times 10^{-4}$        | 0.4                               | 0.96                        | $6.9 \times 10^{-3}$         | 3.9                               | 0.99                        |
| NaB/Fe <sub>3</sub> O <sub>4</sub> _5:1_HC    | 2.9                              | $5.9 \times 10^{-4}$        | 0.8                               | 0.96                        | $1.7 \times 10^{-2}$         | 3.3                               | 0.99                        |
| CaB/Fe <sub>3</sub> O <sub>4</sub> _1:1_HC    | 3.9                              | $5.5 \times 10^{-4}$        | 0.4                               | 0.97                        | $1.8 \times 10^{-2}$         | 4.0                               | 0.99                        |
| CaB/Fe <sub>3</sub> O <sub>4</sub> _5:1_HC    | 3.3                              | $5.5 \times 10^{-4}$        | 0.6                               | 0.96                        | $1.8 \times 10^{-2}$         | 3.3                               | 0.99                        |
| Sep/Fe <sub>3</sub> O <sub>4</sub> _5:1_HC    | 4.4                              | $5.4 \times 10^{-4}$        | 0.3                               | 0.96                        | $1.3 \times 10^{-2}$         | 4.6                               | 0.99                        |
| Fe <sub>3</sub> O <sub>4</sub> _CP            | 2.9                              | $5.8 \times 10^{-4}$        | 0.7                               | 0.97                        | $1.4 \times 10^{-3}$         | 4.4                               | 0.99                        |
| MMT@Fe <sub>3</sub> O <sub>4</sub> _3:1_CP    | 2.0                              | $6.3 \times 10^{-4}$        | 1.7                               | 0.96                        | $9.9 \times 10^{-3}$         | 2.1                               | 0.98                        |
| MMTK10@Fe <sub>3</sub> O <sub>4</sub> _3:1_CP | 2.5                              | $5.1 \times 10^{-4}$        | 0.7                               | 0.92                        | $6.3 \times 10^{-3}$         | 2.5                               | 0.96                        |
| LDH2@Fe <sub>3</sub> O <sub>4</sub> _3:1_CP   | 16.5                             | $5.3 \times 10^{-4}$        | 0.7                               | 0.96                        | $4.5 \times 10^{-3}$         | 16.7                              | 0.99                        |
| CaB@Fe <sub>3</sub> O <sub>4</sub> _3:1_CP    | 3.4                              | $5.9 \times 10^{-4}$        | 0.5                               | 0.97                        | $1.9 \times 10^{-2}$         | 3.6                               | 0.99                        |
| Sep@Fe <sub>3</sub> O <sub>4</sub> _3:1_CP    | 0.9                              | $5.3 \times 10^{-4}$        | 5.4                               | 0.94                        | $1.1 \times 10^{-2}$         | 1.1                               | 0.98                        |

a= mg g<sup>-1</sup>, b= min<sup>-1</sup>, c= g<sup>-1</sup> mg<sup>-1</sup> min<sup>-0.5</sup>.

**Table S13** Kinetic parameters for both heterocoagulated and coprecipitated samples against MB after 1h of adsorption test.

| Sample name                                   | Pseudo-First Order Reaction      |                             |                                   |                             | Pseudo-Second Order Reaction |                                   |                             |
|-----------------------------------------------|----------------------------------|-----------------------------|-----------------------------------|-----------------------------|------------------------------|-----------------------------------|-----------------------------|
|                                               | q <sub>e</sub> exp. <sup>a</sup> | K <sub>1</sub> <sup>b</sup> | q <sub>e</sub> calc. <sup>a</sup> | R <sub>1</sub> <sup>2</sup> | K <sub>2</sub> <sup>c</sup>  | q <sub>e</sub> calc. <sup>a</sup> | R <sub>2</sub> <sup>2</sup> |
| Fe <sub>3</sub> O <sub>4</sub>                | 0.5                              | 2.8*10 <sup>-4</sup>        | 21.9                              | 0.95                        | 6.2*10 <sup>-2</sup>         | 0.6                               | 0.95                        |
| MMT                                           | 6.7                              | 5.3*10 <sup>-4</sup>        | 0.1                               | 0.96                        | 2.8*10 <sup>-2</sup>         | 6.7                               | 1                           |
| MMTK10                                        | 7.4                              | 5.3*10 <sup>-4</sup>        | 0.1                               | 0.96                        | 9.3*10 <sup>-1</sup>         | 7.4                               | 1                           |
| LDH2                                          | 0.4                              | 5.3*10 <sup>-4</sup>        | 63.1                              | 0.95                        | 4.2*10 <sup>-2</sup>         | 0.4                               | 0.97                        |
| NaB                                           | 7.1                              | 5.5*10 <sup>-4</sup>        | 0.1                               | 0.96                        | 1.9*10 <sup>-1</sup>         | 7.1                               | 1                           |
| CaB                                           | 7.2                              | 5.3*10 <sup>-4</sup>        | 0.1                               | 0.96                        | 3.8*10 <sup>-1</sup>         | 7.3                               | 1                           |
| Sep                                           | 7.4                              | 5.3*10 <sup>-4</sup>        | 0.1                               | 0.96                        | 3.7*10 <sup>-1</sup>         | 7.4                               | 1                           |
| MMT/Fe <sub>3</sub> O <sub>4</sub> _1:1_HC    | 7.3                              | 5.3*10 <sup>-4</sup>        | 0.1                               | 0.96                        | 1.7*10 <sup>-1</sup>         | 7.2                               | 1                           |
| MMT/Fe <sub>3</sub> O <sub>4</sub> _5:1_HC    | 7.1                              | 5.3*10 <sup>-4</sup>        | 0.1                               | 0.97                        | 8.4*10 <sup>-2</sup>         | 7.0                               | 1                           |
| MMTK10/Fe <sub>3</sub> O <sub>4</sub> _1:1_HC | 7.4                              | 5.3*10 <sup>-4</sup>        | 0.1                               | 0.96                        | 1.85                         | 7.4                               | 1                           |
| MMTK10/Fe <sub>3</sub> O <sub>4</sub> _5:1_HC | 7.4                              | 5.3*10 <sup>-4</sup>        | 0.1                               | 0.96                        | 9.2*10 <sup>-2</sup>         | 7.4                               | 1                           |
| LDH2/Fe <sub>3</sub> O <sub>4</sub> _1:1_HC   | 0.9                              | 5.3*10 <sup>-4</sup>        | 7.4                               | 0.96                        | 1.9*10 <sup>-2</sup>         | 1.1                               | 0.97                        |
| LDH2/Fe <sub>3</sub> O <sub>4</sub> _5:1_HC   | 0.4                              | 5.8*10 <sup>-4</sup>        | 50.1                              | 0.97                        | 7.5*10 <sup>-2</sup>         | 0.4                               | 0.99                        |
| NaB/Fe <sub>3</sub> O <sub>4</sub> _1:1_HC    | 7.1                              | 5.4*10 <sup>-4</sup>        | 0.1                               | 0.97                        | 1.2*10 <sup>-1</sup>         | 7.1                               | 1                           |
| NaB/Fe <sub>3</sub> O <sub>4</sub> _5:1_HC    | 7.1                              | 5.4*10 <sup>-4</sup>        | 0.1                               | 0.97                        | 1.3*10 <sup>-1</sup>         | 7.1                               | 1                           |
| CaB/Fe <sub>3</sub> O <sub>4</sub> _1:1_HC    | 7.4                              | 5.4*10 <sup>-4</sup>        | 0.1                               | 0.96                        | 6.2*10 <sup>-1</sup>         | 7.4                               | 1                           |
| CaB/Fe <sub>3</sub> O <sub>4</sub> _5:1_HC    | 7.4                              | 5.5*10 <sup>-4</sup>        | 0.1                               | 0.97                        | 1.6*10 <sup>-1</sup>         | 7.3                               | 1                           |
| Sep/Fe <sub>3</sub> O <sub>4</sub> _5:1_HC    | 7.4                              | 5.3*10 <sup>-4</sup>        | 0.1                               | 0.97                        | 3.7                          | 7.4                               | 1                           |
| Fe <sub>3</sub> O <sub>4</sub> _CP            | 1.7                              | 5.5*10 <sup>-4</sup>        | 2.6                               | 0.95                        | 3.6*10 <sup>-2</sup>         | 1.7                               | 0.99                        |
| MMT@Fe <sub>3</sub> O <sub>4</sub> _3:1_CP    | 7.2                              | 5.4*10 <sup>-4</sup>        | 0.1                               | 0.97                        | 1.1*10 <sup>-1</sup>         | 7.2                               | 1                           |
| MMTK10@Fe <sub>3</sub> O <sub>4</sub> _3:1_CP | 7.4                              | 5.4*10 <sup>-4</sup>        | 0.1                               | 0.97                        | 9.2*10 <sup>-1</sup>         | 7.4                               | 1                           |
| LDH2@Fe <sub>3</sub> O <sub>4</sub> _3:1_CP   | 3.2                              | 5.5*10 <sup>-4</sup>        | 0.6                               | 0.97                        | 4.1*10 <sup>-2</sup>         | 3.2                               | 0.99                        |
| CaB@Fe <sub>3</sub> O <sub>4</sub> _3:1_CP    | 7.1                              | 5.4*10 <sup>-4</sup>        | 0.1                               | 0.96                        | 1.4*10 <sup>-1</sup>         | 7.1                               | 1                           |
| Sep@Fe <sub>3</sub> O <sub>4</sub> _3:1_CP    | 7.3                              | 5.4*10 <sup>-4</sup>        | 0.1                               | 0.96                        | 4.7*10 <sup>-1</sup>         | 7.4                               | 1                           |

a= mg g<sup>-1</sup>, b= min<sup>-1</sup>, c= g<sup>-1</sup> mg<sup>-1</sup> min<sup>-0.5</sup>.

**Table S14** Kinetic studies for phenols removal. Relative standard deviations associated with q<sub>e</sub> (exp) are in the range of 3-5%, attributable to the uncertainty associated with the measurement instrument used.

| Sample name                                 | Pseudo-first order          |                                        |                                      |                             | Pseudo-second order         |                           |                         |                             | Weber and Morris – Intraparticle diffusion |                |                |
|---------------------------------------------|-----------------------------|----------------------------------------|--------------------------------------|-----------------------------|-----------------------------|---------------------------|-------------------------|-----------------------------|--------------------------------------------|----------------|----------------|
|                                             | K <sub>1</sub> <sup>a</sup> | q <sub>e</sub> <sup>b</sup><br>(theor) | q <sub>e</sub> <sup>b</sup><br>(exp) | R <sub>1</sub> <sup>2</sup> | K <sub>2</sub> <sup>c</sup> | q <sub>e</sub><br>(theor) | q <sub>e</sub><br>(exp) | R <sub>2</sub> <sup>2</sup> | K <sup>d</sup>                             | C <sup>e</sup> | R <sup>2</sup> |
| CaB/Fe <sub>3</sub> O <sub>4</sub> _5:1_HC  | 4*10 <sup>-1</sup>          | 15.4                                   | 30.8                                 | 0.428                       | 9*10 <sup>-3</sup>          | 30.9                      | 30.8                    | 0.988                       | 0.6                                        | 3.7            | 0.817          |
| LDH2/Fe <sub>3</sub> O <sub>4</sub> _5:1_HC | 8*10 <sup>-3</sup>          | 3.6                                    | 44.0                                 | 0.009                       | 5*10 <sup>-1</sup>          | 39.8                      | 44.0                    | 0.993                       | 0.3                                        | 30.0           | 0.189          |

a= h<sup>-1</sup>, b= μg g<sup>-1</sup>, c= μg g<sup>-1</sup> h<sup>-1</sup>, d= μg g<sup>-1</sup> h<sup>-0.5</sup>.
